# Supplementary material for: All Cause and Cardiovascular Mortality Risk in Metabolically Healthy and Unhealthy Obesity: Results From NHANES 1999-2018
Source: Research Square preprint supplement (doi:10.21203/rs.3.rs-6181171/v1), 2025-05-06
Supplement: Supplementary file 1 [file 1cb26d9875095ba7fe4883a6.pdf]

## STROBE Statement—Checklist of items that should be included in reports of cohort studies

|                            | Item No | Recommendation                                                                                                                                                                                                                                                                                                              | Page     |
|----------------------------|---------|-----------------------------------------------------------------------------------------------------------------------------------------------------------------------------------------------------------------------------------------------------------------------------------------------------------------------------|----------|
| <b>Title and abstract</b>  | 1       | (a) Indicate the study's design with a commonly used term in the title or the abstract.<br>(b) Provide in the abstract an informative and balanced summary of what was done and what was found.                                                                                                                             | 1<br>1-2 |
| <b>Introduction</b>        |         |                                                                                                                                                                                                                                                                                                                             |          |
| Background/rationale       | 2       | Explain the scientific background and rationale for the investigation being reported                                                                                                                                                                                                                                        | 2        |
| Objectives                 | 3       | State specific objectives, including any prespecified hypotheses.                                                                                                                                                                                                                                                           | 2-3      |
| <b>Methods</b>             |         |                                                                                                                                                                                                                                                                                                                             |          |
| Study design Setting       | 4       | Present key elements of study design early in the paper.                                                                                                                                                                                                                                                                    | 3        |
| Participants               | 5       | (a) Give the eligibility criteria, and the sources and methods of selection of participants. Describe methods of follow-up.<br>(b) For matched studies, give matching criteria .                                                                                                                                            | 3-4      |
| Definition/Variables       | 6       | Clearly define all outcomes, exposures, predictors, potential confounders, and effect modifiers.<br>Give diagnostic criteria, if applicable.                                                                                                                                                                                | 4-5      |
| Ascertain Mortality        | 7       | Describe ascertainment of mortality methods if there is more than one group.                                                                                                                                                                                                                                                | 5        |
| Statistical methods        | 8       | (a) Describe all statistical methods, including those used to control for confounding.<br>(b) Describe any methods used to examine subgroups and interactions.<br>(c) Explain how missing data were addressed.<br>(d) If applicable, explain how loss to follow-up was addressed.<br>(e) Describe any sensitivity analyses. | 5-6      |
| <b>Results</b>             |         |                                                                                                                                                                                                                                                                                                                             |          |
| Baseline characteristics   | 9*      | Report numbers of individuals at each stage of study-eg numbers potentially eligible, examined for age, BMI, Sex, Ethnicity, education, poverty ratio, drink, physical activity, smoke, TC, TG, HbA1c, HEI, Calories, hypertension.                                                                                         | 9-12     |
| MHO and mortality analyses | 10*     | (a) Give characteristics of study participants (eg demographic, clinical, social) and information on all-cause mortality and cardiovascular mortality.<br>(b) Summarise follow-up time (eg, average and total amount)                                                                                                       | 13-14    |
| Stratified Analyses        | 11*     | Observe in the stratified analyses based on age (<60), sex (Female or Male), race/ethnicity (Non-Hispanic White or                                                                                                                                                                                                          | 14-16    |

|                             |     |                                                                                                                                                                              |       |
|-----------------------------|-----|------------------------------------------------------------------------------------------------------------------------------------------------------------------------------|-------|
|                             |     | other Hispanic), drinking status (nondrinker), physical activity (active or inactive), smoking status (never smoker or current smoker), and self-reported hypertension (no). |       |
| <i>Sensitivity analyses</i> | 12* | Give Hazard ratio (95% CIs) for MHO and MUO                                                                                                                                  | 16    |
| <b>Discussion</b>           |     |                                                                                                                                                                              |       |
| Key results                 | 13  | Summarise key results with reference to study objectives.                                                                                                                    | 17    |
| Limitations                 | 14  | Discuss limitations of the study, taking into account sources of potential bias or imprecision. Discuss the generalisability (external validity) of the study results.       | 17-19 |
| Interpretation              | 15  | Give a cautious overall interpretation of results considering objectives, limitations, multiplicity of analyses, results from similar studies, and other relevant evidence.  | 17-19 |
| Generalisability            | 16  | Discuss the generalisability (external validity) of the study results.                                                                                                       | 17-19 |
| <b>Other information</b>    |     |                                                                                                                                                                              |       |
| Funding                     | 17  | Give the source of funding and the role of the funders for the present study and, if applicable, for the original study on which the present article is based.               | 19    |

\*Give information separately for MHO and MUO groups.

Note: An Explanation and Elaboration article discusses each checklist item and gives methodological background and published examples of transparent reporting.
